# Supplementary material for: An alkynyl-protected Ag13−xCu6+x nanocluster for catalytic hydrogenation
Source: Royal Society of Chemistry journal article supplement (doi:10.1039/d2dt03295c), 2022-11-21
Supplement: d2dt03295c1.pdf [file d2dt03295c1.pdf]

## Supplementary Information

### An alkynyl-protected $\text{Ag}_{13-x}\text{Cu}_{6+x}$ nanocluster for catalytic hydrogenation

Yan-Li Gao<sup>1+\*</sup>, Xueli Sun<sup>2+</sup>, Xiongfai Tang<sup>3+</sup>, Zhenlang Xie<sup>3</sup>, Guolong Tian<sup>3</sup>, Zi-Ang Nan<sup>4\*</sup>, Huayan Yang<sup>4\*</sup>, and Hui Shen<sup>2\*</sup>

<sup>1</sup> School of Chemistry and Chemical Engineering, Yulin University, Yulin 719000, China. Email: gaoyanli8503@126.com.

<sup>2</sup> College of Energy Materials and Chemistry, Inner Mongolia University, Hohhot 010021, China. Email: shen@imu.edu.cn.

<sup>3</sup> State Key Laboratory of Physical Chemistry of Solid Surfaces and College of Chemistry and Chemical Engineering, Xiamen University, Xiamen, 361005, China

<sup>4</sup> School of Biomedical Engineering, Health Science Center, Shenzhen University, Guangdong 518060, China. Email: yanghuayan@szu.edu.cn.

<sup>+</sup> These authors contribute equally to this work.

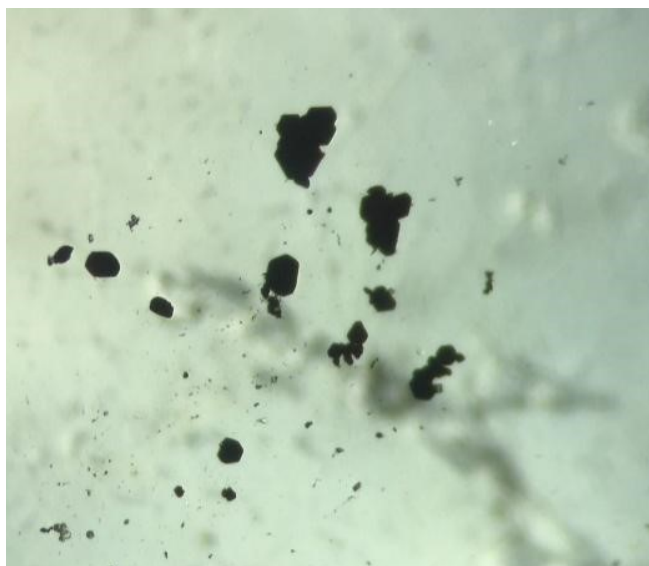

**Figure S1.** Digital photographs of single crystals of  $[\text{Ag}_{13-x}\text{Cu}_{6+x}(\text{4BuC}_6\text{H}_4\text{C}\equiv\text{C})_{14}(\text{PPh}_3)_6](\text{SbF}_6)_3$  cluster.

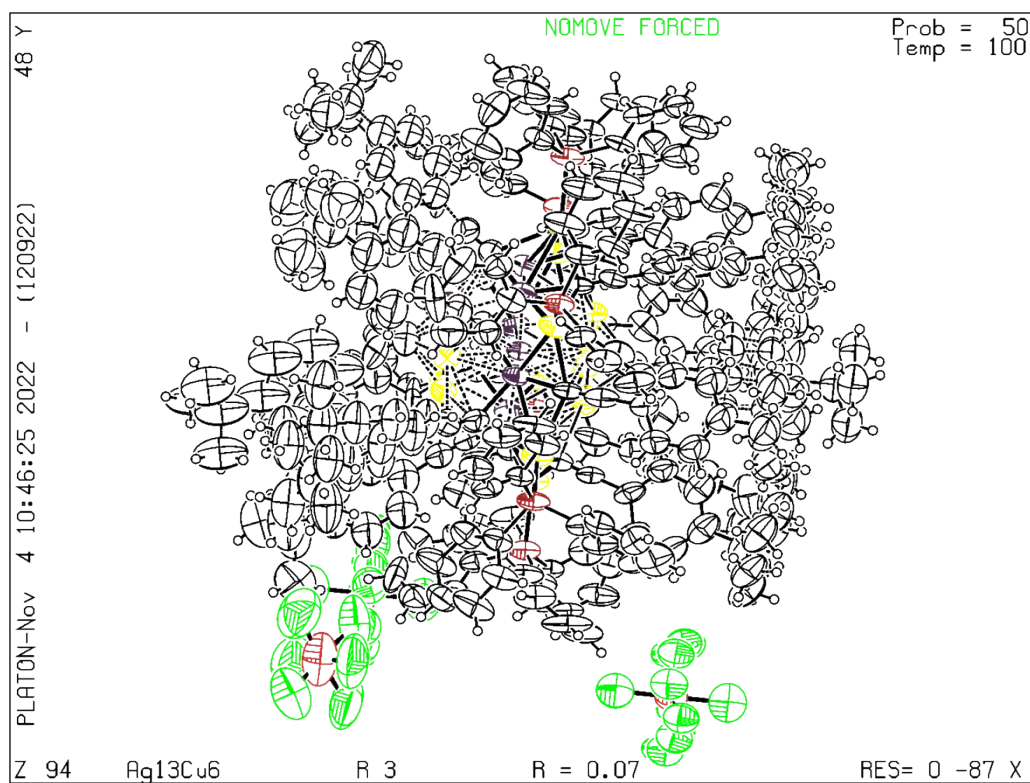

**Figure S2.** The thermal ellipsoids of the ORTEP diagram of  $[\text{Ag}_{13-x}\text{Cu}_{6+x}(\text{4BuC}_6\text{H}_4\text{C}\equiv\text{C})_{14}(\text{PPh}_3)_6](\text{SbF}_6)_3$  cluster.

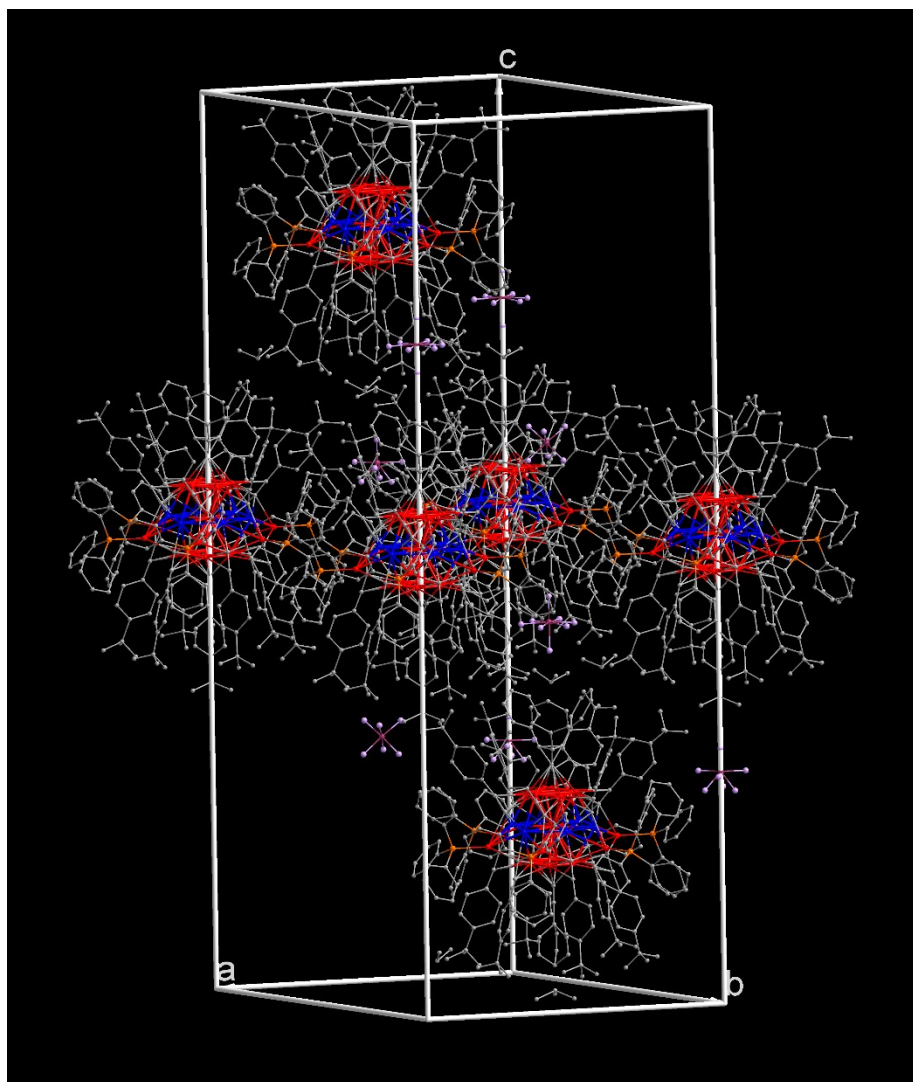

**Figure S3.** The packing structure of  $[\text{Ag}_{13-x}\text{Cu}_{6+x}(\text{tBuC}_6\text{H}_4\text{C}\equiv\text{C})_{14}(\text{PPh}_3)_6](\text{SbF}_6)_3$  cluster in their single crystals. Color codes for atoms: red spheres, Ag; blue spheres, Cu; orange spheres, P; grey spheres, C; purple spheres, Sb; violet spheres, F. All hydrogen atoms are omitted for clarity.

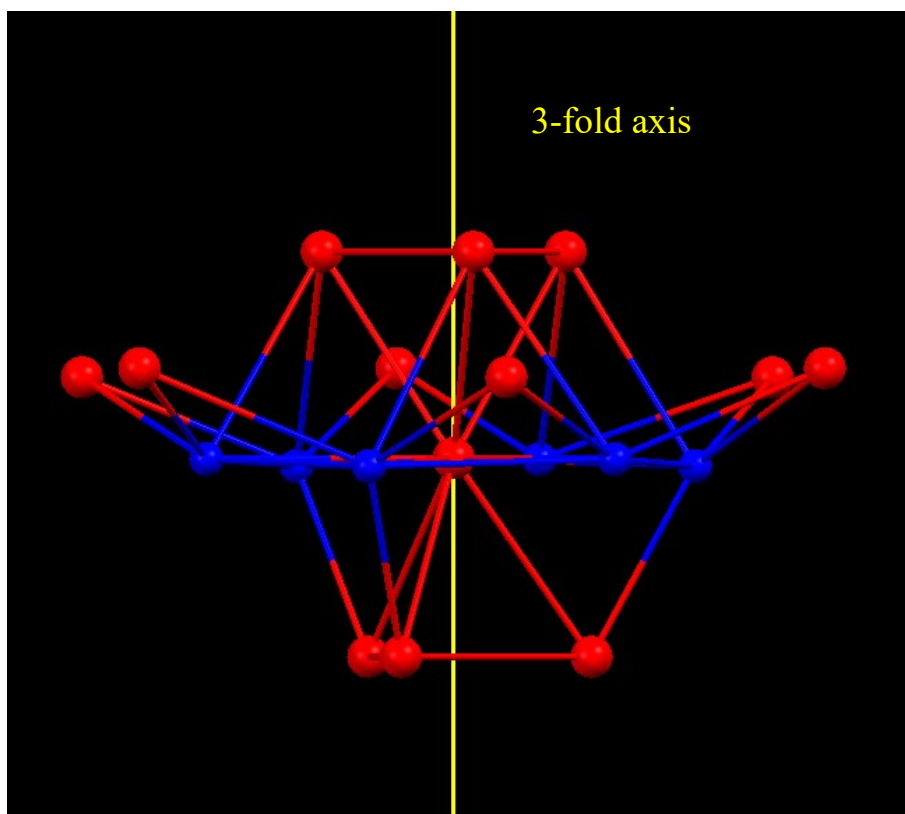

**Figure S4.** View of 3-fold axis along  $a$ -axis of  $[\text{Ag}_{13-x}\text{Cu}_{6+x}(\text{tBuC}_6\text{H}_4\text{C}\equiv\text{C})_{14}(\text{PPh}_3)_6](\text{SbF}_6)_3$  cluster. Color codes for atoms: red spheres, Ag; blue spheres, Cu.

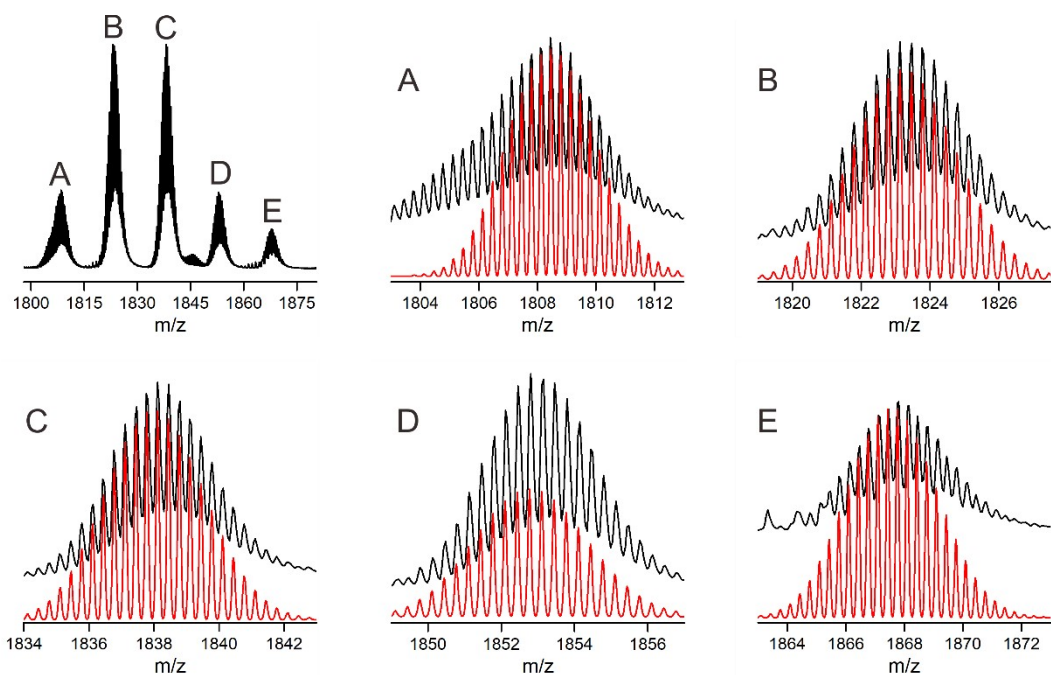

**Figure S5.** The enlarged ESI-MS spectra of  $[\text{Ag}_{13-x}\text{Cu}_{6+x}(\text{BuC}_6\text{H}_4\text{C}\equiv\text{C})_{14}(\text{PPh}_3)_6]^{3+}$  showing the presence of Ag-Cu exchange. From A to E is the experimental and simulated isotopic patterns of the molecular ion peak  $[\text{Ag}_{13-x}\text{Cu}_{6+x}(\text{BuC}_6\text{H}_4\text{C}\equiv\text{C})_{14}(\text{PPh}_3)_6]^{3+}$  ( $x=3, 2, 1, 0, -1$ ), respectively.

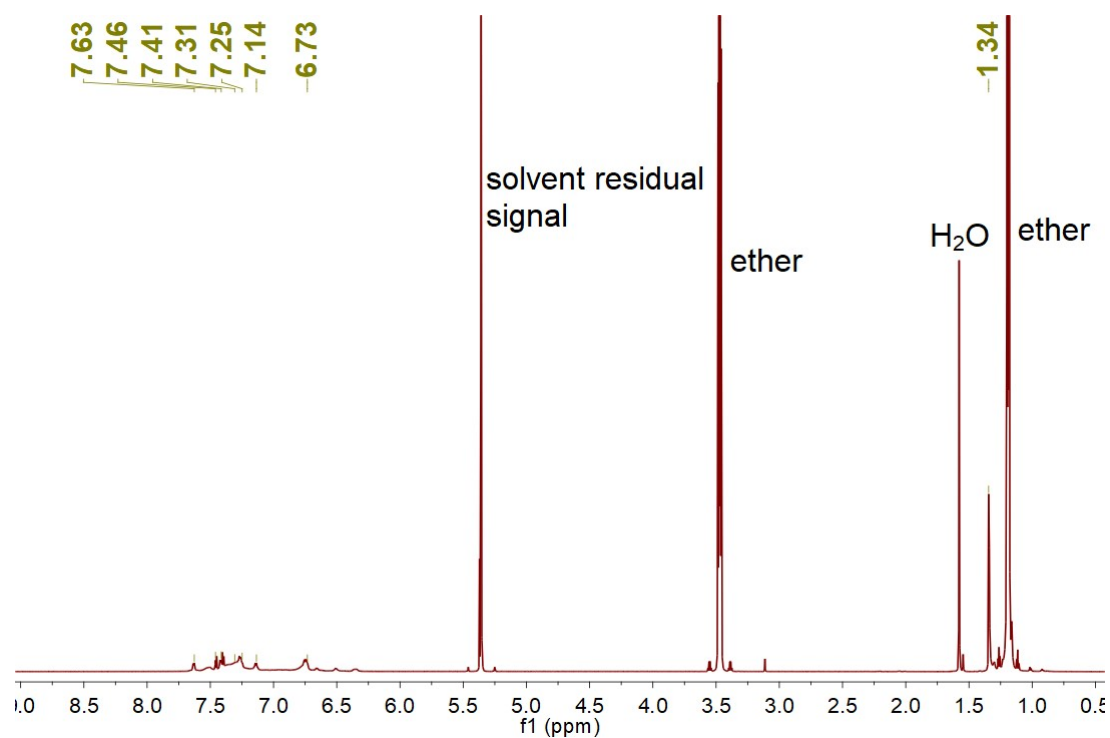

**Figure S6.**  $^1\text{H}$  NMR of  $[\text{Ag}_{13-x}\text{Cu}_{6+x}(\text{BuC}_6\text{H}_4\text{C}\equiv\text{C})_{14}(\text{PPh}_3)_6](\text{SbF}_6)_3$  cluster in  $\text{CD}_2\text{Cl}_2$ .

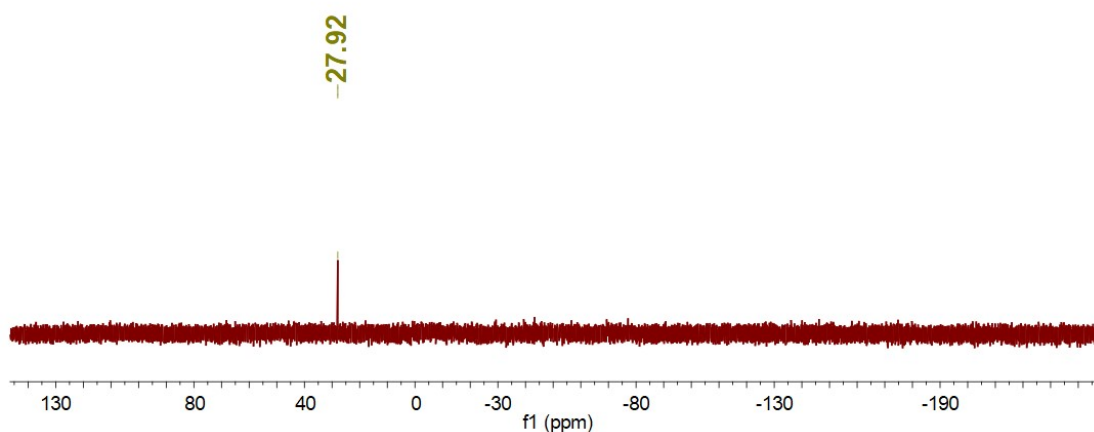

**Figure S7.** Proton-decoupled  $^{31}\text{P}$  NMR of  $[\text{Ag}_{13-x}\text{Cu}_{6+x}(\text{tBuC}_6\text{H}_4\text{C}\equiv\text{C})_{14}(\text{PPh}_3)_6](\text{SbF}_6)_3$  cluster in  $\text{CD}_2\text{Cl}_2$ .

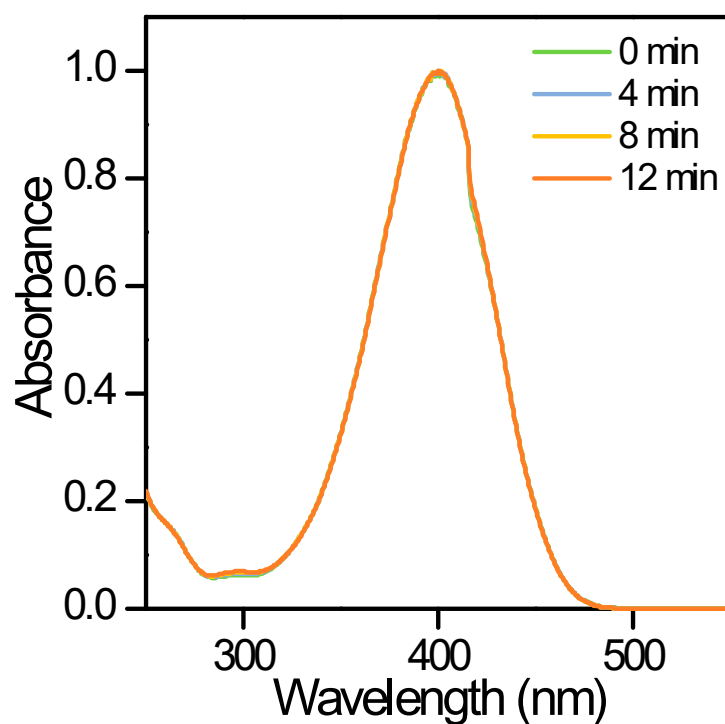

**Figure S8.** Time-dependent UV-Vis spectra of XC-72 catalyzed reduction of 4-nitrophenol, showing its inertness toward the reaction.

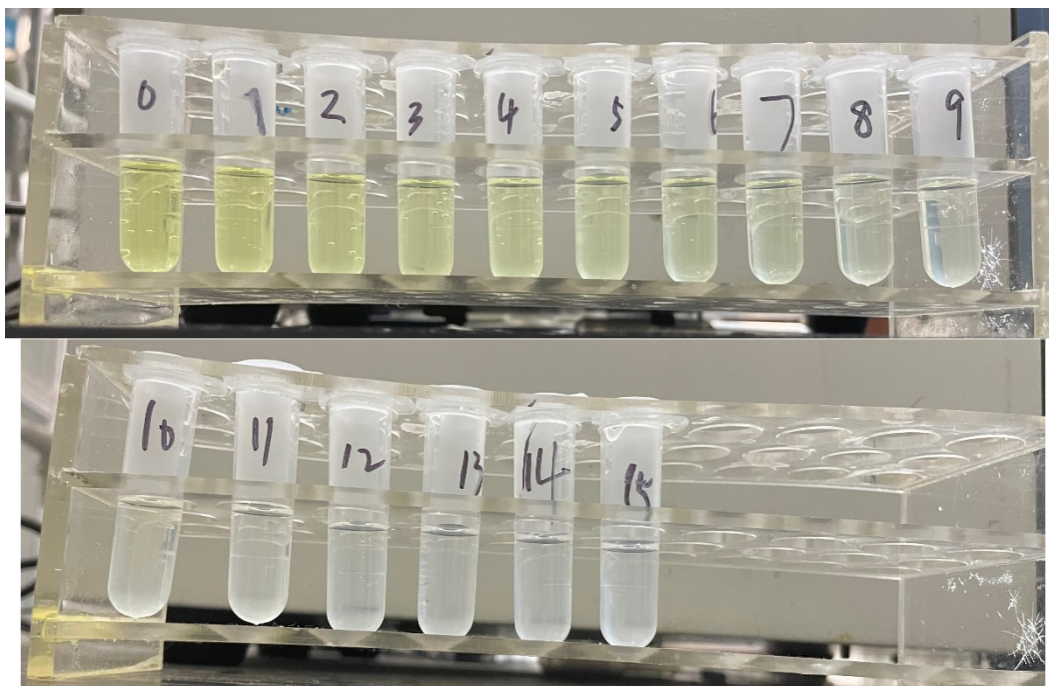

**Figure S9.** Time-dependent digital photographs of  $\text{Ag}_{13-x}\text{Cu}_{6+x}/\text{XC-72}$  catalyzed hydrogenation of 4-nitrophenol.

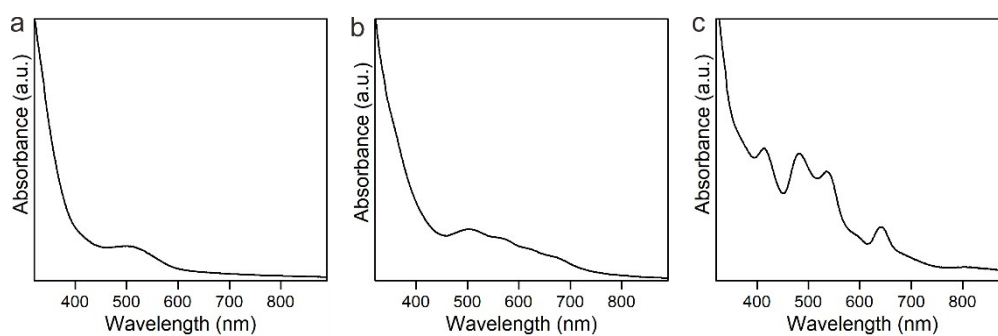

**Figure S10.** UV-Vis spectra of  $[\text{Ag}_{25}\text{Cu}_4(\text{PhC}\equiv\text{C})_{12}(\text{PPh}_3)_{12}\text{Cl}_6\text{H}_8](\text{SbF}_6)_3$  (a),  $[\text{Ag}_9\text{Cu}_6(\text{t-BuC}\equiv\text{C})_{12}]\text{SbF}_6$  (b) and  $\text{Ag}_{44}(\text{SC}_6\text{H}_4\text{CF}_3)_{30}$  (c) clusters, respectively.



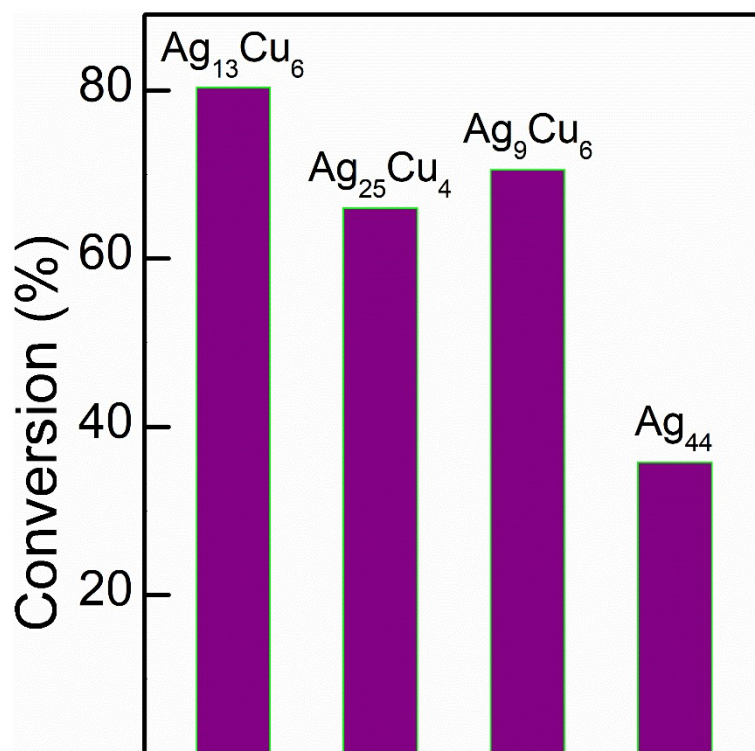

**Figure S11.** Comparison of catalytic activity of different clusters in hydrogenation of 4-nitrophenol. Note: The conversion was calculated based on the data at 8 min. All the clusters were supported on the XC-72 before catalysis.



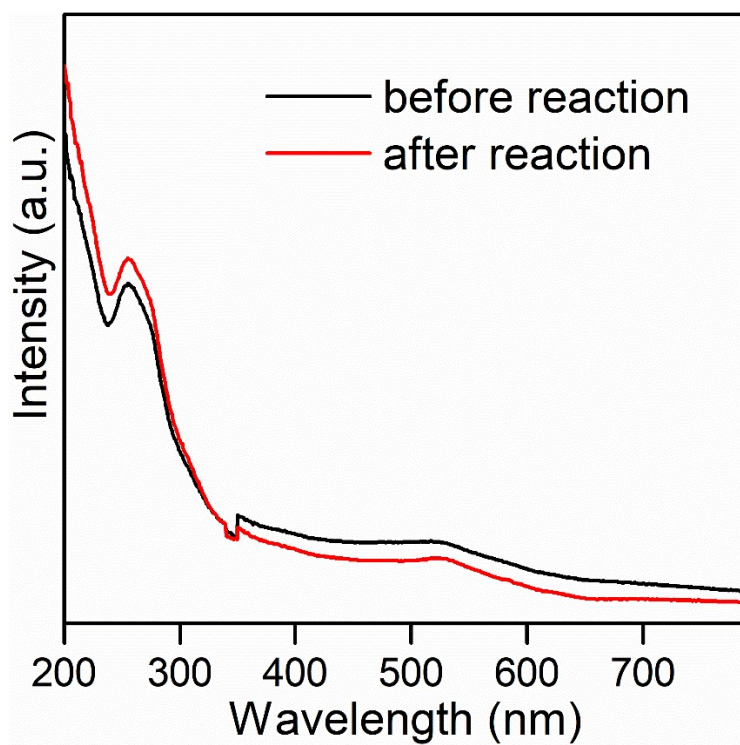

**Figure S12.** Solid UV-Vis spectra of  $\text{Ag}_{13-x}\text{Cu}_{6+x}/\text{TiO}_2$  before and after catalysis in hydrogenation of 4-nitrophenol.

**Table S1.** Crystallographic data of  $[\text{Ag}_{13-x}\text{Cu}_{6+x}(\text{tBuC}_6\text{H}_4\text{C}\equiv\text{C})_{14}(\text{PPh}_3)_6](\text{SbF}_6)_3$ .

|                               |                                                                                                                         |
|-------------------------------|-------------------------------------------------------------------------------------------------------------------------|
| identification code           | $[\text{Ag}_{13-x}\text{Cu}_{6+x}(\text{tBuC}_6\text{H}_4\text{C}\equiv\text{C})_{14}(\text{PPh}_3)_6](\text{SbF}_6)_3$ |
| formula                       | $\text{C}_{276}\text{H}_{272}\text{Ag}_{13-x}\text{Cu}_{6+x}\text{P}_6\text{F}_{18}\text{Sb}_3$                         |
| formula weight                | 6265.54                                                                                                                 |
| Temperature/K                 | 100.00(10)                                                                                                              |
| crystal system                | trigonal                                                                                                                |
| space group                   | $R\bar{3}$                                                                                                              |
| $a$ (Å)                       | 20.1767(4)                                                                                                              |
| $b$ (Å)                       | 20.1767(4)                                                                                                              |
| $c$ (Å)                       | 59.918(2)                                                                                                               |
| $\alpha$ (°)                  | 90                                                                                                                      |
| $\beta$ (°)                   | 90                                                                                                                      |
| $\gamma$ (°)                  | 120                                                                                                                     |
| $V$ (Å <sup>3</sup> )         | 21124.4(11)                                                                                                             |
| $Z$                           | 3                                                                                                                       |
| $D_c$ / (g·cm <sup>-3</sup> ) | 1.478                                                                                                                   |
| Radiation                     | Cu K $\alpha$ ( $\lambda$ = 1.54184 Å)                                                                                  |
| Theta (°) range               | 3.8869 to 64.4100                                                                                                       |
| Index ranges                  | $-23 \leq h \leq 22, -23 \leq k \leq 22, -70 \leq l \leq 69$                                                            |
| Refls. Total                  | 14935                                                                                                                   |
| restraints                    | 12084                                                                                                                   |
| parameters                    | 1268                                                                                                                    |
| $R_{\text{int}}$              | 0.0466                                                                                                                  |
| $R_1/wR_2$                    | 0.0774                                                                                                                  |
| [ $I > 2\sigma(I)$ ]          | 0.2105                                                                                                                  |
| $R_1/wR_2$                    | 0.0895                                                                                                                  |
| (all data)                    | 0.2360                                                                                                                  |
| completeness                  | 0.9996                                                                                                                  |
| Goof                          | 1.034                                                                                                                   |

**Table S2** Selected bond lengths (Å) for cluster Ag<sub>13-x</sub>Cu<sub>6+x</sub>.

| Parameter | value     | Parameter | value     |
|-----------|-----------|-----------|-----------|
| Ag01-Ag05 | 2.856(2)  | Ag05-C01N | 2.441(14) |
| Ag01-Ag0B | 2.845(4)  | Cu08-C013 | 2.178(19) |
| Ag01-Ag00 | 2.764(9)  | Cu08-C01D | 1.98(2)   |
| Ag02-Cu08 | 2.654(2)  | Cu08-C01N | 1.954(18) |
| Ag02-Cu09 | 2.846(3)  | Cu09-Cu08 | 2.820(3)  |
| Ag02-P0C  | 2.385(4)  | Cu08-Cu09 | 2.837(3)  |
| Ag02-C00Z | 2.44(3)   | Cu09-Ag00 | 2.500(10) |
| Ag02-C01D | 2.59(2)   | Cu09-C00Z | 2.00(3)   |
| Ag02 C01N | 2.432(14) | Cu09-C013 | 1.98(2)   |
| Ag03-Ag05 | 3.293(2)  | Cu09-C01D | 2.13(2)   |
| Ag03-Cu08 | 2.818(2)  | Ag00-Ag00 | 2.737(14) |
| Ag03-Cu09 | 2.678(2)  | Ag00-C013 | 2.33(2)   |
| Ag03-P00D | 2.389(4)  | Ag00-C01D | 2.34(2)   |
| Ag03-C00Z | 2.40(3)   | Ag00-C01R | 2.53(2)   |
| Ag03-C013 | 2.548(16) | Ag05-Cu08 | 2.919(3)  |
| Ag03-C01N | 2.500(13) | Ag05-Cu09 | 2.895(3)  |
| Ag05-Ag05 | 2.809(3)  | Ag05-C00Y | 2.28(2)   |
| Ag05-Ag05 | 2.809(3)  | Ag05-C00Z | 2.41(2)   |

**Table S3** Selected angles (°) for cluster Ag<sub>13-x</sub>Cu<sub>6+x</sub>.

| Parameter      | value      | Parameter      | value      |
|----------------|------------|----------------|------------|
| Ag05-Ag01-Ag05 | 58.90(6)   | Ag01-Ag05-Ag03 | 98.82(6)   |
| Cu09-Ag01-Ag05 | 61.62(7)   | Ag01-Ag05-Cu08 | 59.35(6)   |
| Cu09-Ag01-Ag05 | 120.47(8)  | Ag01-Ag05-Cu09 | 58.16(6)   |
| Cu09-Ag01-Ag05 | 92.45(7)   | Ag05-Ag05-Ag01 | 60.55(3)   |
| Ag00-Ag00-Ag01 | 60.32(15)  | Ag05-Ag05-Ag03 | 140.76(7)  |
| Cu09-Ag01-Cu09 | 119.910(8) | Ag05-Ag05-Ag03 | 141.73(7)  |
| Ag00-Ag01-Ag05 | 113.32(19) | Ag05-Ag05-Ag05 | 60.0       |
| Ag00-Ag01-Ag05 | 163.3(2)   | Ag05-Ag05-Cu08 | 88.79(7)   |
| Ag00-Ag01-Ag05 | 132.2(2)   | Ag05-Ag05-Cu08 | 119.87(5)  |
| Ag00-Ag01-Cu09 | 103.9(2)   | Ag05-Ag05-Cu09 | 118.67(5)  |
| Ag00-Ag01-Cu09 | 106.3(2)   | Ag05-Ag05-Cu09 | 91.36(7)   |
| Ag00-Ag01-Cu09 | 53.43(19)  | Cu08-Ag05-Ag03 | 53.54(6)   |
| Ag00-Ag01-Ag00 | 59.4(3)    | Ag01-Cu08-Ag05 | 59.24(6)   |
| Cu08-Ag02-Cu09 | 61.58(7)   | Ag02-Cu08-Ag01 | 115.71(8)  |
| P0C-Ag02-Cu08  | 145.94(14) | Ag02-Cu08-Ag03 | 115.09(10) |
| P0C-Ag02-Cu09  | 133.03(13) | Ag02-Cu08-Ag05 | 98.35(9)   |
| P00D-Ag03-Ag05 | 153.03(15) | Ag02-Cu08-Cu09 | 158.38(12) |
| P00D-Ag03-Cu08 | 132.43(13) | Ag02-Cu08-Cu09 | 62.56(7)   |
| P00D-Ag03-Cu09 | 148.61(14) | Ag03-Cu08-Ag01 | 110.97(8)  |
| Cu09-Ag05-Ag03 | 50.78(6)   | Ag03-Cu08-Ag05 | 70.04(7)   |
| Cu09-Ag05-Cu08 | 58.41(7)   | Ag03-Cu08-Cu09 | 56.53(6)   |
| Ag01-Cu09-Ag02 | 111.71(8)  | Ag03-Cu08-Cu09 | 160.30(12) |
| Ag01-Cu09-Ag05 | 60.22(6)   | Cu09-Cu08-Ag01 | 58.98(6)   |
| Ag01-Cu09-Cu08 | 61.01(6)   | Cu09-Cu08-Ag05 | 90.64(9)   |
| Ag02-Cu09-Ag05 | 94.28(9)   | Ag02-Cu09-Ag05 | 94.28(9)   |
| Ag03-Cu09-Ag01 | 117.43(8)  | Ag00-Cu09-Ag03 | 125.3(3)   |
| Cu08-Cu09-Cu08 | 122.20(11) | Ag00-Cu09-Ag05 | 120.8(2)   |
| Ag00-Cu09-Ag01 | 62.6(2)    | Ag00-Cu09-Cu08 | 79.0(3)    |
| Ag00-Cu09-Ag02 | 120.2(3)   | Ag00-Cu09-Cu08 | 76.5(2)    |
| Ag00-Ag00-Ag00 | 60.001(4)  |                |            |
